# Supplementary material for: Multimodal Imaging of Orthotopic Mouse Model of Endometrial Carcinoma
Source: PubMed Central journal article supplement (PMC4529312; doi:10.1371/journal.pone.0135220), 2015-08-07

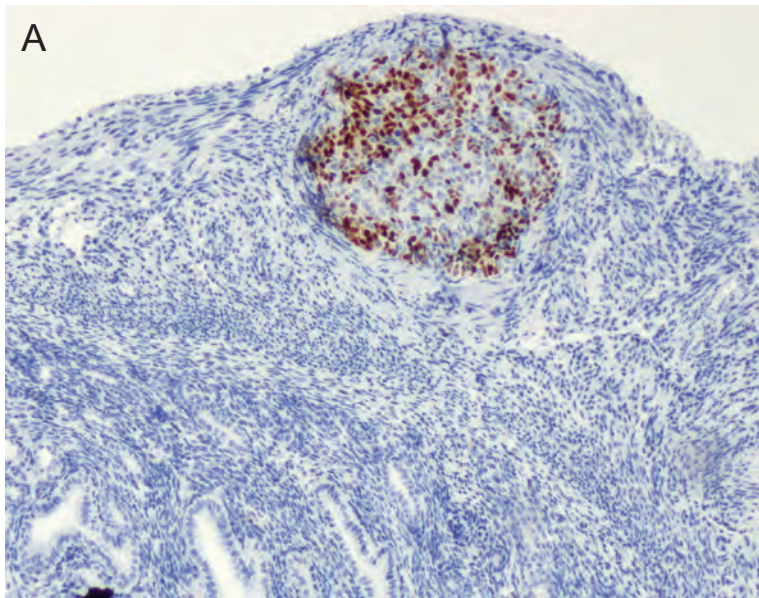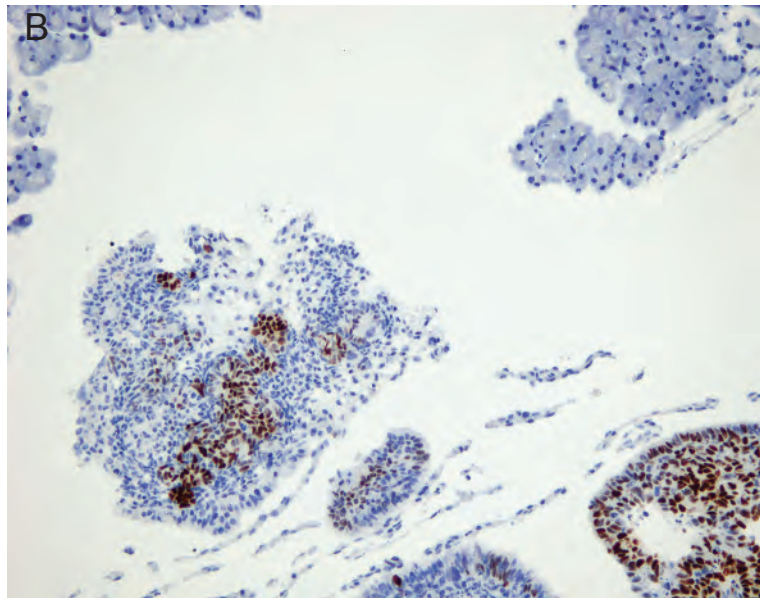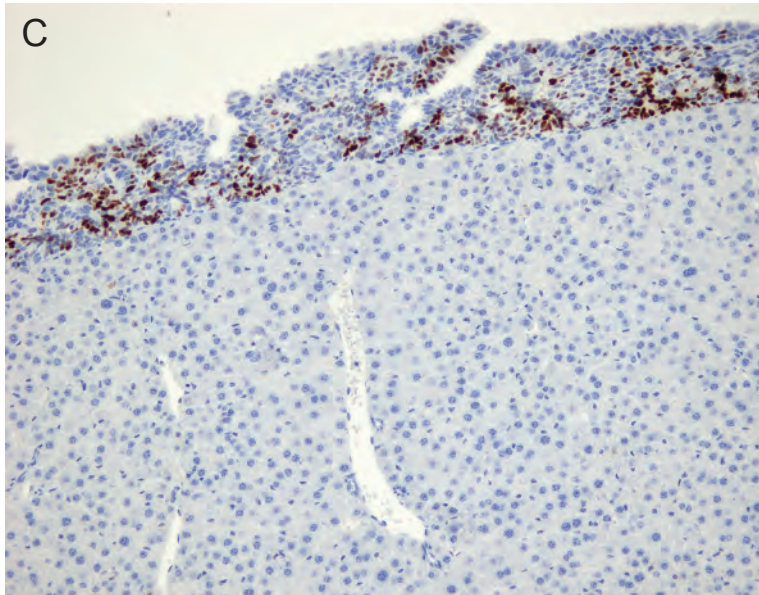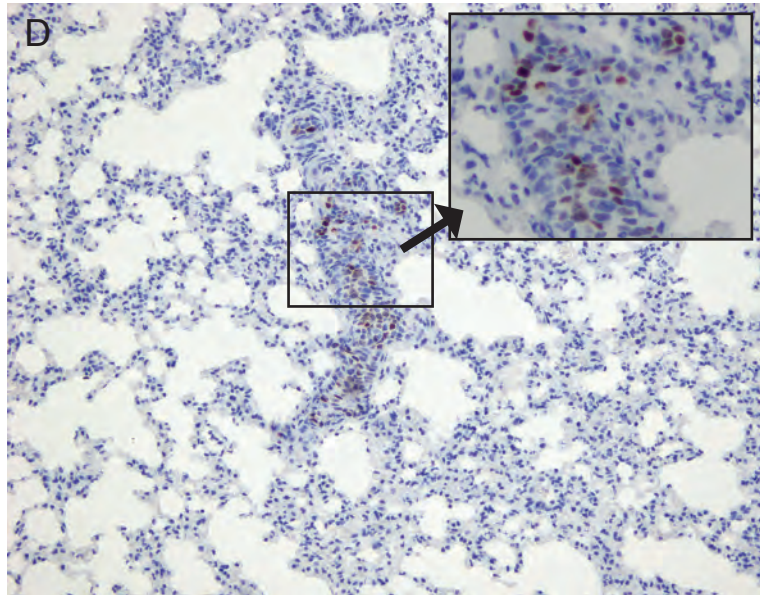

Supplement: pone.0135220.s002.pdf [file pone.0135220.s002.pdf]
